# Supplementary material for: From computational screening to the synthesis of a promising OER catalyst
Source: Royal Society of Chemistry journal article supplement (doi:10.1039/d4sc00192c), 2024-01-01
Supplement: d4sc00192c1.pdf [file d4sc00192c1.pdf]

## From computational screening to the synthesis of a promising OER catalyst – Supplementary Information

*Sai Govind Hari Kumar, Carlota Bozal-Ginesta, Ning Wang, Jehad Abed,*

*Jonathan Shan,  
Zhenpeng Yao\*,  
Aspuru-Guzik*

*Alan*

Table S1: Performance of all four catalysts in this report

| Compound                                           | Overpotential at 10mA/cm <sup>2</sup> (mV) | Tafel Slope (mV.dec <sup>-1</sup> ) |
|----------------------------------------------------|--------------------------------------------|-------------------------------------|
| GaCo <sub>2</sub> O <sub>4</sub>                   | 270                                        | 79                                  |
| Co <sub>3</sub> O <sub>4</sub>                     | 170                                        | 65                                  |
| Co <sub>2.5</sub> Ga <sub>0.5</sub> O <sub>4</sub> | 220                                        | 56                                  |
| Co <sub>1.7</sub> Al <sub>1.3</sub> O <sub>4</sub> | 193                                        | 77                                  |

Table S2: Compositional ratios of all elements of all materials explored in this report based on the ratios of the areas of peaks corresponding to  $\text{Co}^{2+}$  and  $\text{Co}^{3+}$ . Data obtained from XPS

| Assumed Composition                        | $\text{Co}^{2+}$ ratio | $\text{Co}^{3+}$ ratio | True Composition                           |
|--------------------------------------------|------------------------|------------------------|--------------------------------------------|
| $\text{Co}_3\text{O}_4$                    | 1                      | 2                      | $\text{Co}_3\text{O}_4$                    |
| $\text{Co}_{2.5}\text{Ga}_{0.5}\text{O}_4$ | 1                      | 1.5                    | $\text{Co}_{2.5}\text{Ga}_{0.5}\text{O}_4$ |
| $\text{Co}_{1.5}\text{Ga}_{1.5}\text{O}_4$ | 1                      | 1                      | $\text{GaCo}_2\text{O}_4$                  |
| $\text{Co}_{1.5}\text{Al}_{1.5}\text{O}_4$ | 0.7                    | 1                      | $\text{Co}_{1.7}\text{Al}_{1.3}\text{O}_4$ |

Table S3: Double layer capacitance and ECSA of each catalyst studied in this report. The specific capacitance used to determine the ECSA is 0.04 mF

| Catalyst                                   | Capacitance (mF) | ECSA |
|--------------------------------------------|------------------|------|
| $\text{Co}_3\text{O}_4$                    | 282              | 7050 |
| $\text{Co}_{2.5}\text{Ga}_{0.5}\text{O}_4$ | 163              | 4075 |
| $\text{Co}_{1.5}\text{Al}_{1.5}\text{O}_4$ | 265              | 6625 |
| $\text{Co}_{1.5}\text{Ga}_{1.5}\text{O}_4$ | 121              | 3025 |

Table S4: U values used for all DFT calculations on this report. All U values are taken from Ref. 13

| Element          | U-value |
|------------------|---------|
| Sc               | 3.0     |
| Ti               | 3.9     |
| V                | 3.5     |
| Cr               | 3.5     |
| Mn <sup>2+</sup> | 5.25    |
| Mn <sup>3+</sup> | 4.0     |
| Fe <sup>2+</sup> | 4.0     |
| Fe <sup>3+</sup> | 4.0     |
| Co <sup>2+</sup> | 4.5     |
| Co <sup>3+</sup> | 3.3     |
| Ni <sup>2+</sup> | 6.0     |
| Ni <sup>3+</sup> | 6.4     |
| Cu               | 6.0     |
| Zn               | 4.7     |

| Catalyst (1M KOH)                                                | Overpotential at 10mA/cm <sup>2</sup> (mV) | Tafel Slope (mV.dec) | Reference |
|------------------------------------------------------------------|--------------------------------------------|----------------------|-----------|
| Co <sub>2.5</sub> Ga <sub>0.5</sub> O <sub>4</sub>               | 220                                        | 56                   | This work |
| GaCo <sub>2</sub> O <sub>4</sub>                                 | 270                                        | 79                   | This work |
| Co <sub>3</sub> O <sub>4</sub>                                   | 170                                        | 65                   | This work |
| Co <sub>1.7</sub> Al <sub>1.3</sub> O <sub>4</sub>               | 193                                        | 77                   | This work |
| Ni-Fe Boride                                                     | 167                                        | 25                   | 45        |
| Amorphous NiFe                                                   | 265                                        | 25                   | 41        |
| NiFe LDH/NiFeS <sub>x</sub>                                      | 210                                        | 31                   | 40        |
| NiFe-OOH/Ni foam                                                 | 250                                        | 36                   | 52        |
| Amorphous LaNiFe-OH                                              | 189                                        | 36                   | 42        |
| NiFe-LDH/NiCu                                                    | 218                                        | 56.9                 | 49        |
| NiFe-LDH                                                         | 195                                        | 40.3                 | 50        |
| Au/NiFe-LDH                                                      | 237                                        | 36                   | 54        |
| Ni-Fe-O nanowires                                                | 244                                        | 39                   | 48        |
| NiFeSe/Ni foam                                                   | 198                                        | 54                   | 52        |
| NiMoFe/Ni foam                                                   | 257                                        | 53                   | 52        |
| NiFe-LDH/NiCoP                                                   | 220                                        | 48.6                 | 44        |
| FeCoW/Ni foam                                                    | 210                                        | 53                   | 52        |
| CoV-OOH/Ni foam                                                  | 268                                        | 56                   | 52        |
| CoV-O/Ni foam                                                    | 314                                        | 57                   | 52        |
| CoFeSe/Ni foam                                                   | 195                                        | 63                   | 52        |
| CoPi                                                             | 242                                        | 48                   | 52        |
| CoFePi                                                           | 273                                        | 39.5                 | 39        |
| CoMnP                                                            | 330                                        | 61                   | 55        |
| Ni <sub>x</sub> Co <sub>3-x</sub> S <sub>4</sub>                 | 160                                        | 95                   | 47        |
| Co <sub>3</sub> O <sub>4</sub> /NiCo <sub>2</sub> O <sub>4</sub> | 320                                        | 84                   | 59        |
| RuO <sub>2</sub> /CeO <sub>2</sub>                               | 350                                        | 74                   | 46        |
| RuO <sub>2</sub> /NiO/Ni foam                                    | 250                                        | 50.5                 | 51        |
| NiFe-LDH(nanosheets)                                             | 300                                        | 68                   | 53        |
| RuO <sub>2</sub> /Ni foam                                        | 283                                        | 53.4                 | 51        |
| IrO <sub>2</sub> /Ni foam                                        | 333                                        | 55.6                 | 51        |
| Co <sub>3</sub> O <sub>4</sub> /RuO <sub>2</sub>                 | 250                                        | 55.4                 | 38        |
| Amorphous CoOx/RuO <sub>2</sub>                                  | 270                                        | 69.6                 | 43        |
| Co <sub>3</sub> O <sub>4</sub> /Ppy/VC                           | 330                                        | 105                  | 57        |
| Co <sub>3</sub> O <sub>4</sub> /Ppy/RGO                          | 300                                        | 95                   | 57        |
| Co <sub>3</sub> O <sub>4</sub> microspheres                      | 400                                        | 100                  | 56        |
| Co <sub>3</sub> O <sub>4</sub> /CMC                              | 290                                        | 71                   | 58        |
| Co <sub>3</sub> O <sub>4</sub> /Polyacrylamide                   | 260                                        | 63                   | 58        |
| NiFe <sub>2</sub> O <sub>4</sub> /Fe <sub>3</sub> Ni             | 262                                        | 39.5                 | 9         |
| CoFe <sub>2</sub> O <sub>4</sub> /C nanorods                     | 240                                        | 45                   | 10        |
| CuCo <sub>2</sub> O <sub>4</sub> /C                              | 288                                        | 64.2                 | 11        |
| ZnFe <sub>2</sub> O <sub>4</sub> /Ni foam                        | 280                                        | 70                   | 60        |
| NiCo <sub>2</sub> O <sub>4</sub>                                 | 240                                        | 50                   | 61        |

Table S5: Benchmarking analysis of catalysts explored in this work with well-performing catalysts from other work

Table S6: Solution Resistances for each catalyst

| Samples                                    | Bulk/Solution Resistance ( $\Omega$ ) |
|--------------------------------------------|---------------------------------------|
| $\text{Co}_3\text{O}_4$                    | 2.86                                  |
| $\text{Co}_{1.7}\text{Al}_{1.3}\text{O}_4$ | 2.93                                  |
| $\text{GaCo}_2\text{O}_4$                  | 3.02                                  |
| $\text{Co}_{2.5}\text{Ga}_{0.5}\text{O}_4$ | 3.35                                  |



|                |                 |                |                     |                |                    |                  |                  |                  |                 |                   |                   |                   |                 |                   |                   |                  |                     |
|----------------|-----------------|----------------|---------------------|----------------|--------------------|------------------|------------------|------------------|-----------------|-------------------|-------------------|-------------------|-----------------|-------------------|-------------------|------------------|---------------------|
| H<br>Hydrogen  |                 |                |                     |                |                    |                  |                  |                  |                 |                   |                   |                   |                 |                   |                   |                  | He<br>Helium        |
| Li<br>Lithium  | Be<br>Beryllium |                |                     |                |                    |                  |                  |                  |                 |                   |                   | B<br>Boron        | C<br>Carbon     | N<br>Nitrogen     | O<br>Oxygen       | F<br>Fluorine    | Ne<br>Neon          |
| Na<br>Sodium   | Mg<br>Magnesium |                |                     |                |                    |                  |                  |                  |                 |                   |                   | Al<br>Aluminum    | Si<br>Silicon   | P<br>Phosphorus   | S<br>Sulfur       | Cl<br>Chlorine   | Ar<br>Argon         |
| K<br>Potassium | Ca<br>Calcium   | Sc<br>Scandium | Ti<br>Titanium      | V<br>Vanadium  | Cr<br>Chromium     | Mn<br>Manganese  | Fe<br>Iron       | Co<br>Cobalt     | Ni<br>Nickel    | Cu<br>Copper      | Zn<br>Zinc        | Ga<br>Gallium     | Ge<br>Germanium | As<br>Arsenic     | Se<br>Selenium    | Br<br>Bromine    | Kr<br>Krypton       |
| Rb<br>Rubidium | Sr<br>Strontium | Y<br>Yttrium   | Zr<br>Zirconium     | Nb<br>Niobium  | Mo<br>Molybdenum   | Tc<br>Technetium | Ru<br>Ruthenium  | Rh<br>Rhodium    | Pd<br>Palladium | Ag<br>Silver      | Cd<br>Cadmium     | In<br>Indium      | Sn<br>Tin       | Sb<br>Antimony    | Te<br>Tellurium   | I<br>Iodine      | Xe<br>Xenon         |
| Cs<br>Caesium  | Ba<br>Barium    | Lanthanides    | Hf<br>Hafnium       | Ta<br>Tantalum | W<br>Tungsten      | Re<br>Rhenium    | Os<br>Osmium     | Ir<br>Iridium    | Pt<br>Platinum  | Au<br>Gold        | Hg<br>Mercury     | Tl<br>Thallium    | Pb<br>Lead      | Bi<br>Bismuth     | Po<br>Polonium    | At<br>Astatine   | Rn<br>Radon         |
| Fr<br>Francium | Ra<br>Radium    | Actinides      | Rf<br>Rutherfordium | Db<br>Dubnium  | Sg<br>Seaborgium   | Bh<br>Bohrium    | Hs<br>Hassium    | Mt<br>Meitnerium | Ds<br>Darmstadt | Rg<br>Roentgenium | Cn<br>Copernicium | Nh<br>Nihonium    | Fl<br>Flerovium | Mc<br>Moscovium   | Lv<br>Livermorium | Ts<br>Tennessine | Og<br>Oganesson     |
|                |                 |                | La<br>Lanthanum     | Ce<br>Cerium   | Pr<br>Praseodymium | Nd<br>Neodymium  | Pm<br>Promethium | Sm<br>Samarium   | Eu<br>Europium  | Gd<br>Gadolinium  | Tb<br>Terbium     | Dy<br>Dysprosium  | Ho<br>Holmium   | Er<br>Erbium      | Tm<br>Thulium     | Yb<br>Ytterbium  | Lu<br>Lutetium      |
|                |                 |                | Ac<br>Actinium      | Th<br>Thorium  | Pa<br>Protactinium | U<br>Uranium     | Np<br>Neptunium  | Pu<br>Plutonium  | Am<br>Americium | Cm<br>Curium      | Cf<br>Californium | Es<br>Einsteinium | Fm<br>Fermium   | Md<br>Mendelevium | No<br>Nobelium    | Lr<br>Lawrencium | Rf<br>Rutherfordium |

Figure S1: Periodic table of elements. The elements circled in black represent (apart from Tc) the elements examined this report. All the alkali, alkali earth, transition and post-transition metal elements were examined in this report. Some lanthanides (La,Ce,Nd, Gd and Lu) were also included as well, however, not all lanthanide elements could be included because the number of permutations of compounds would get unmanageably large.





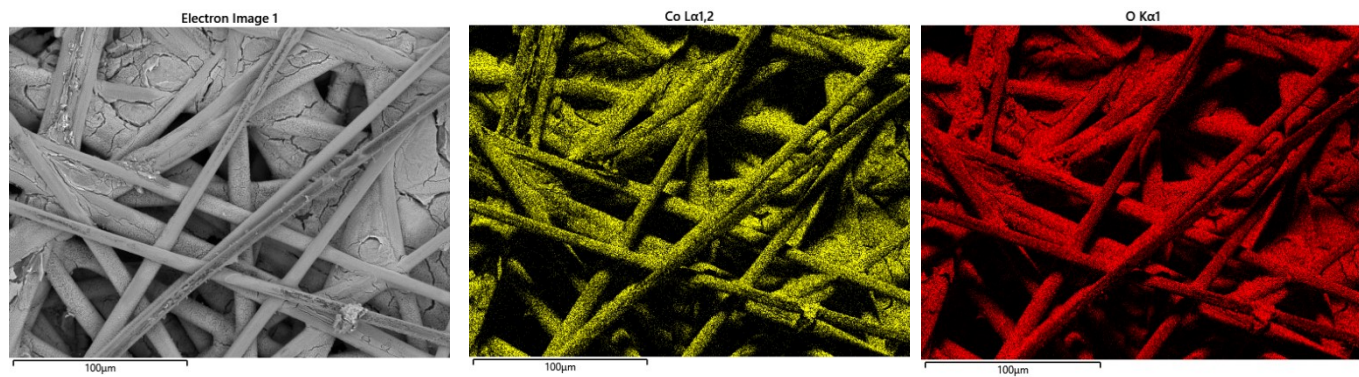

Figure S2: EDS Map of  $\text{Co}_3\text{O}_4$

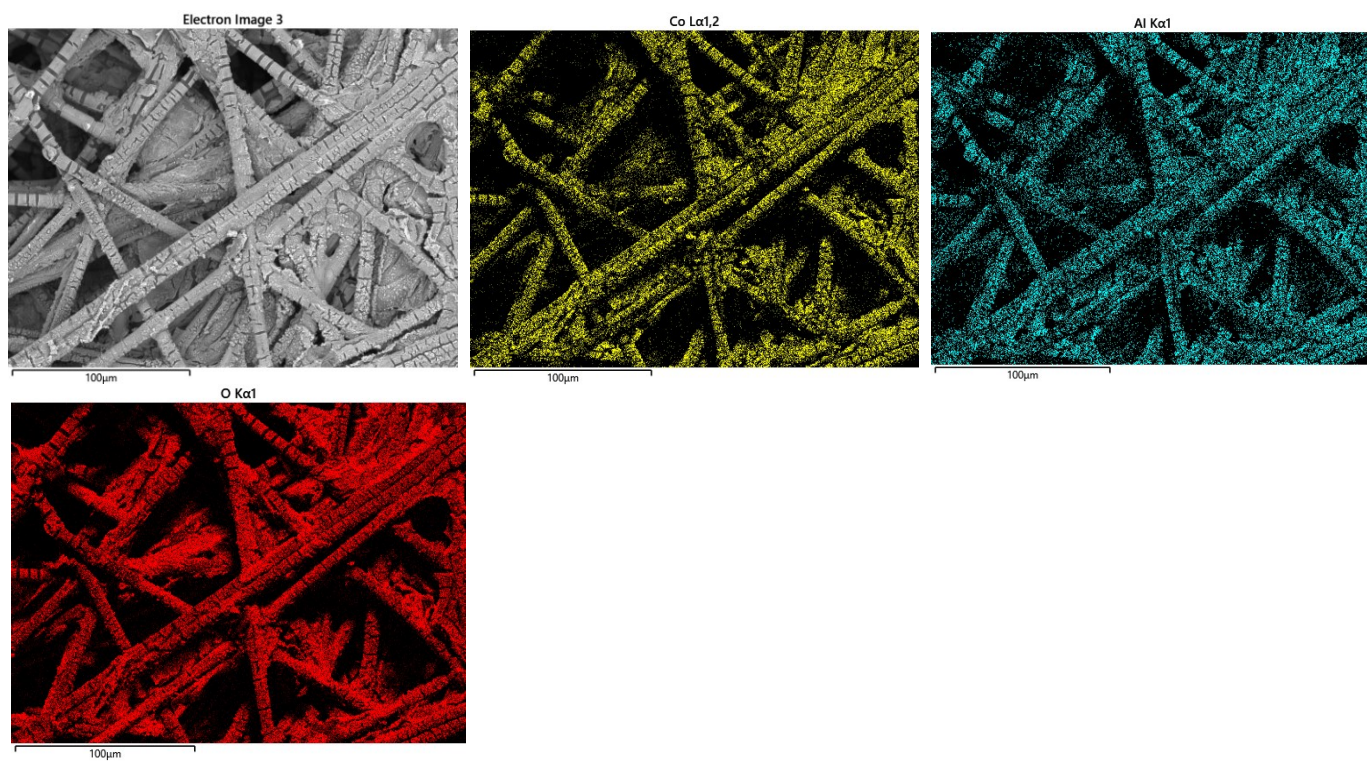

Figure S3: EDS Map of  $\text{Co}_{1.5}\text{Al}_{1.5}\text{O}_4$



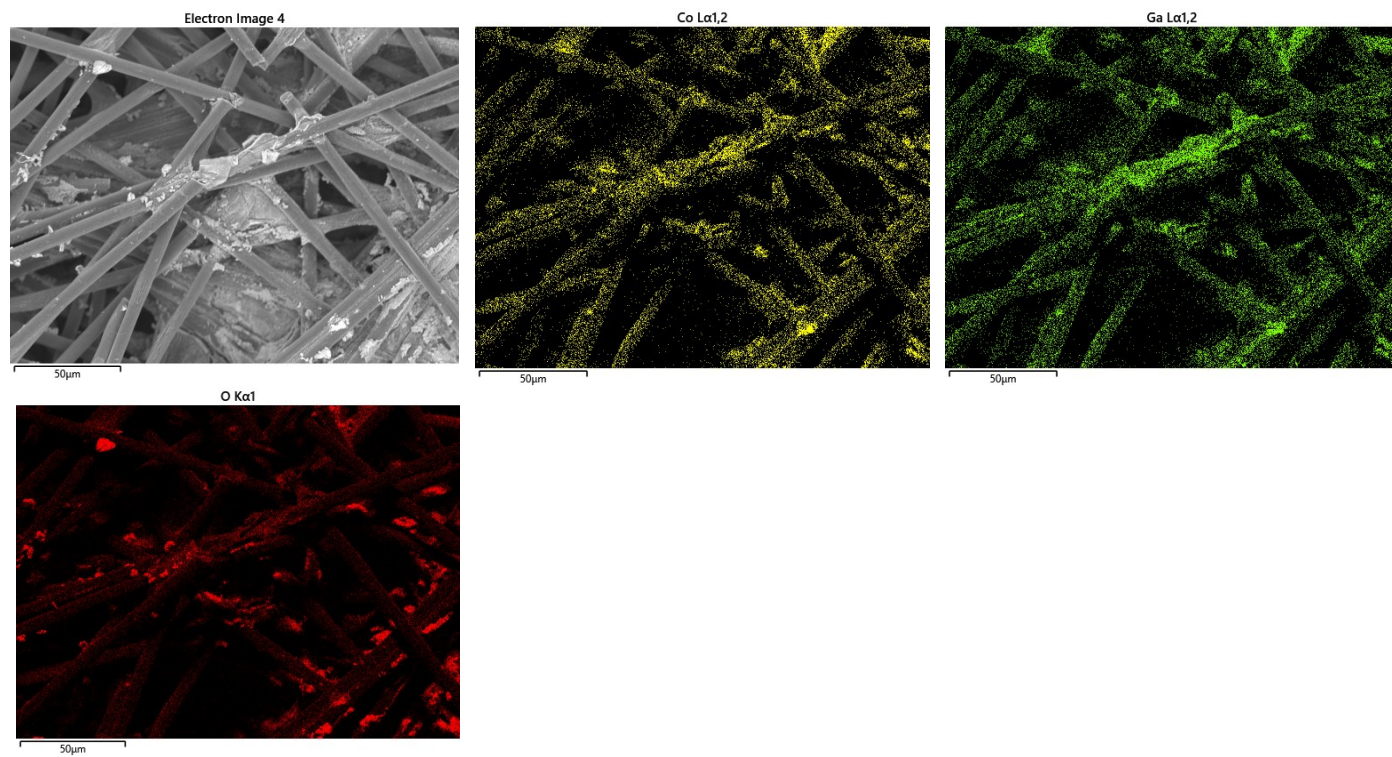

Figure S4: EDS Map of  $\text{Co}_{2.5}\text{Ga}_{0.5}\text{O}_4$

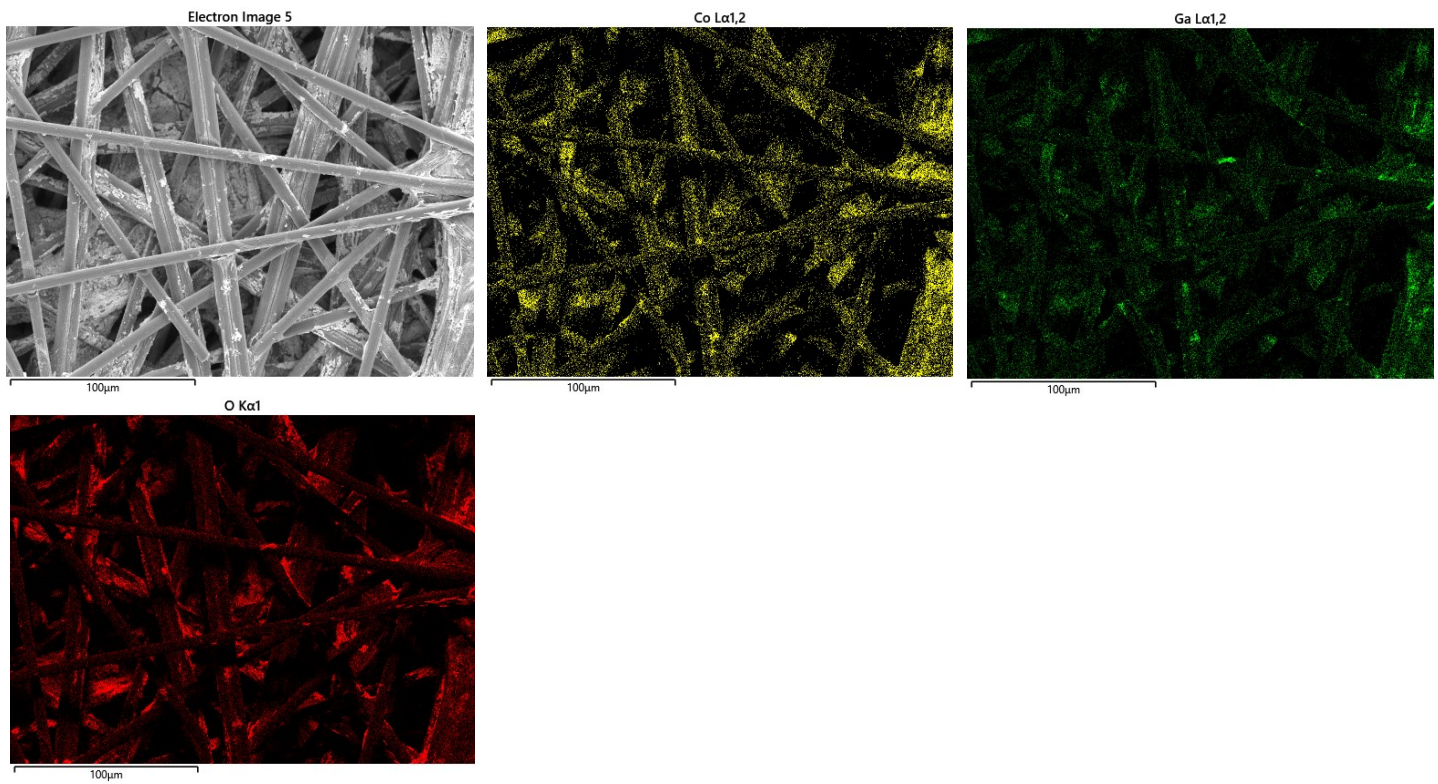

Figure S5: EDS Map of  $\text{Co}_{1.5}\text{Ga}_{1.5}\text{O}_4$



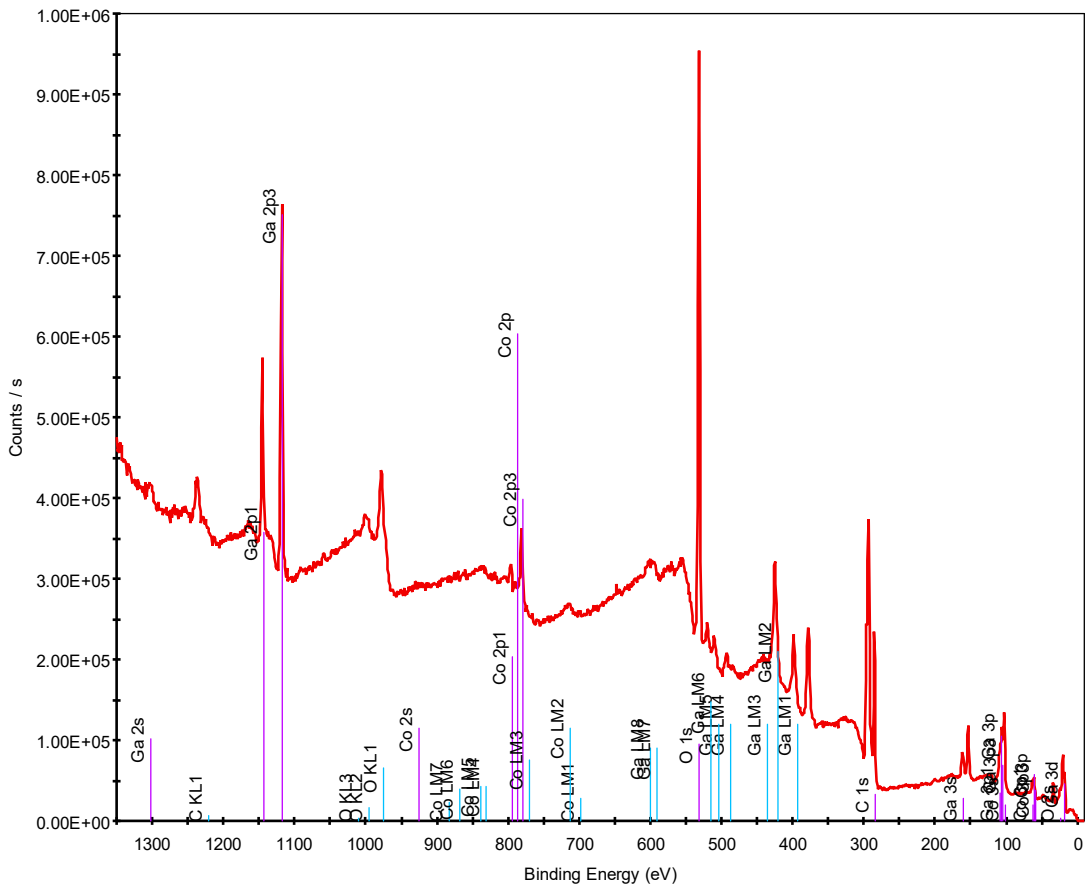

Figure S6: XPS Survey Spectrum of GaCo<sub>2</sub>O<sub>4</sub>

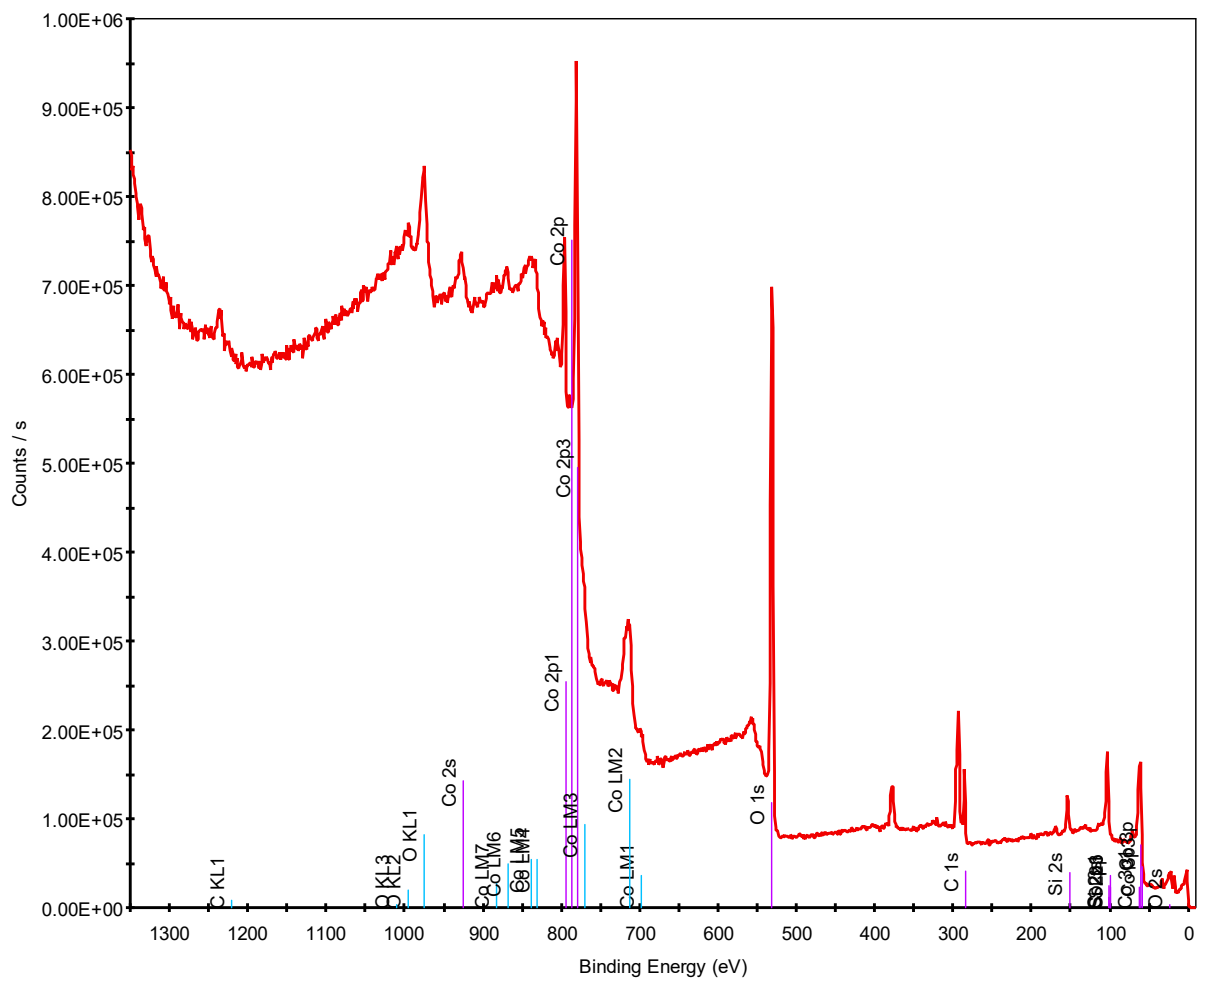

Figure S7: Survey Spectrum of  $\text{Co}_3\text{O}_4$





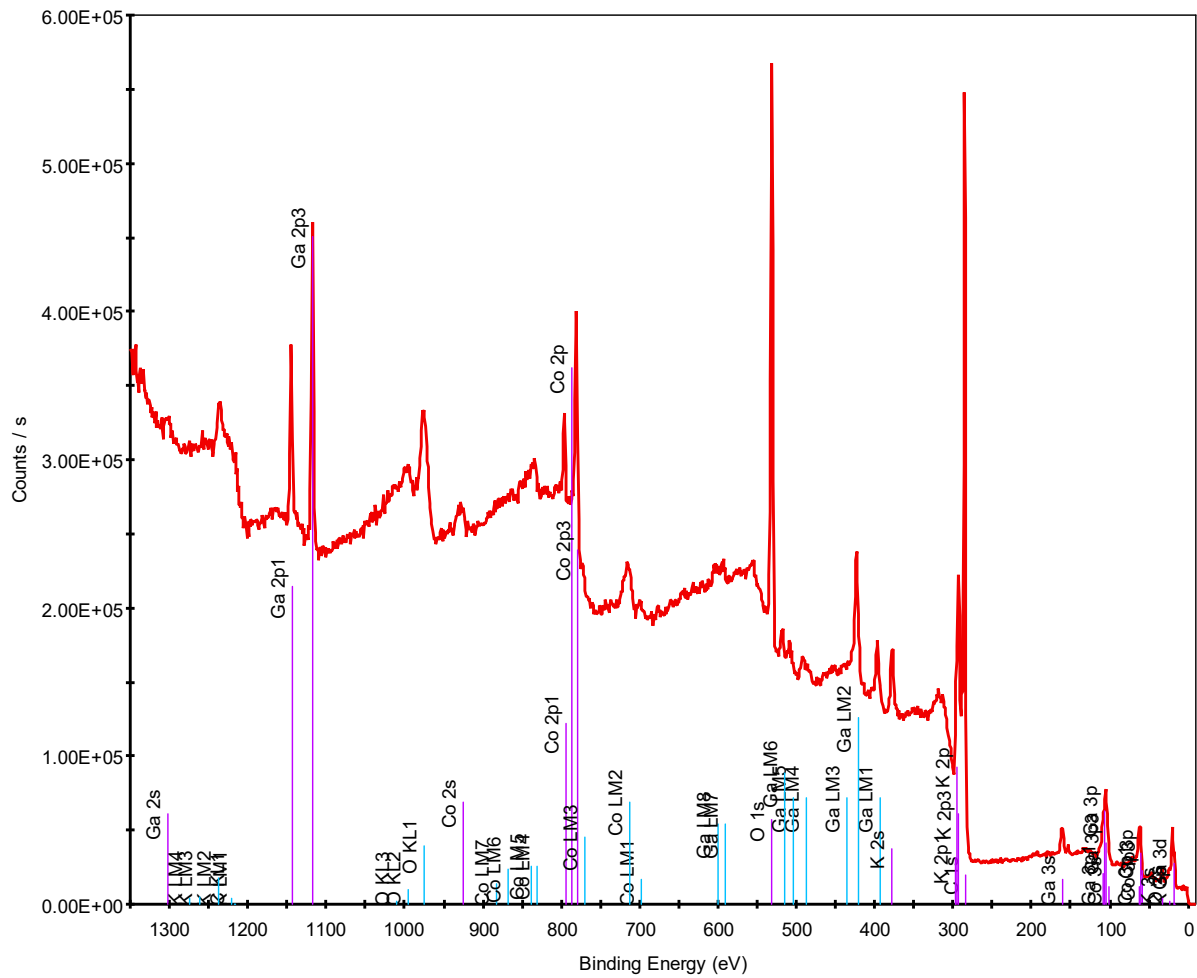

Figure S8: Survey Spectrum of  $\text{Co}_{2.5}\text{Ga}_{0.5}\text{O}_4$



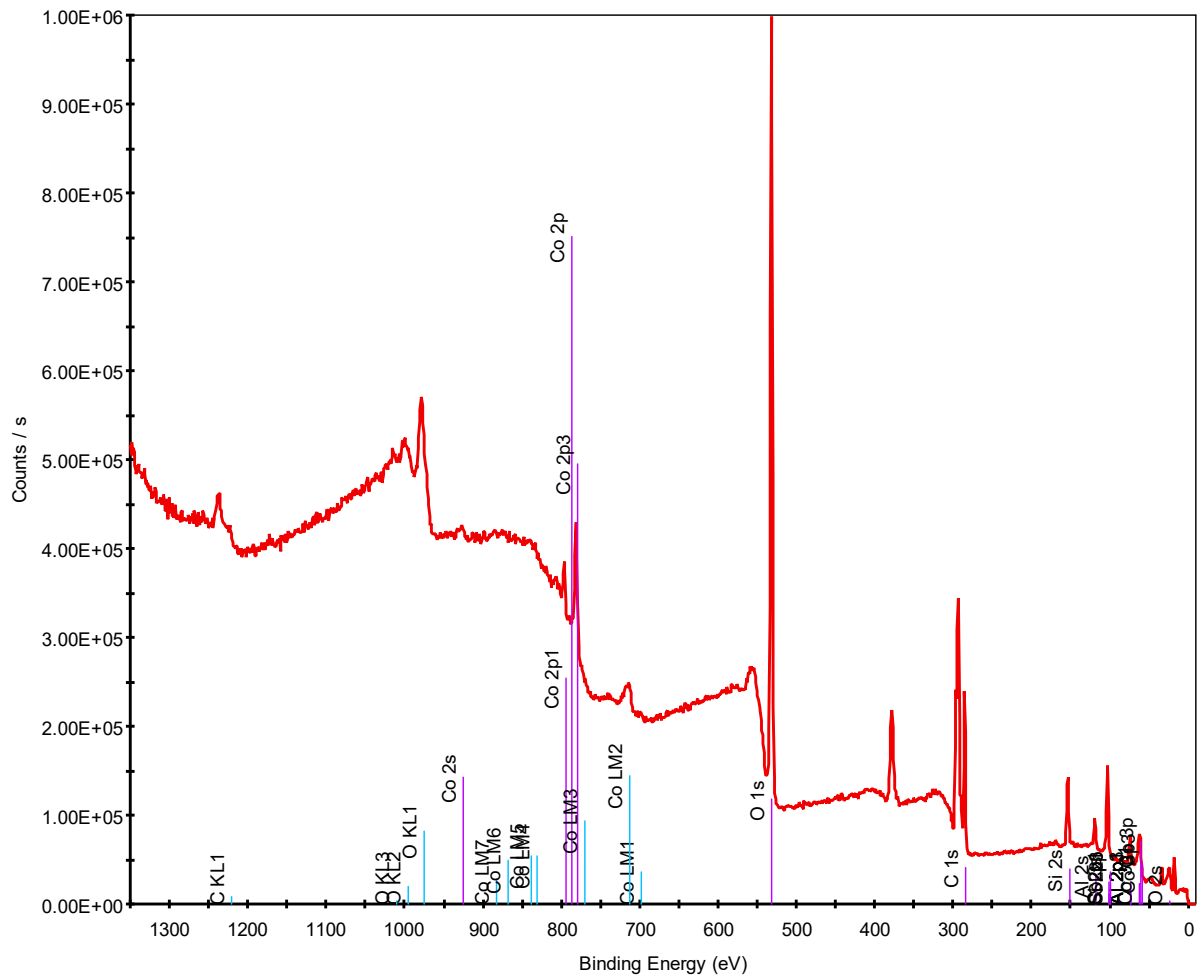

Figure S9: XPS Survey Spectrum of  $\text{Co}_{1.7}\text{Al}_{1.3}\text{O}_4$

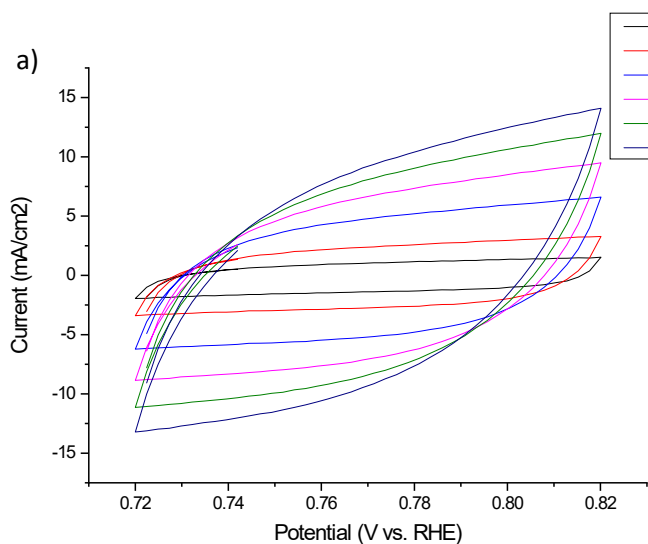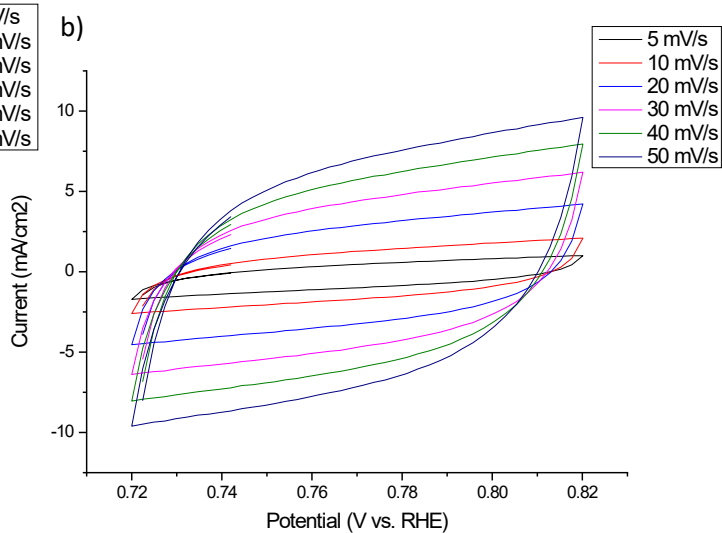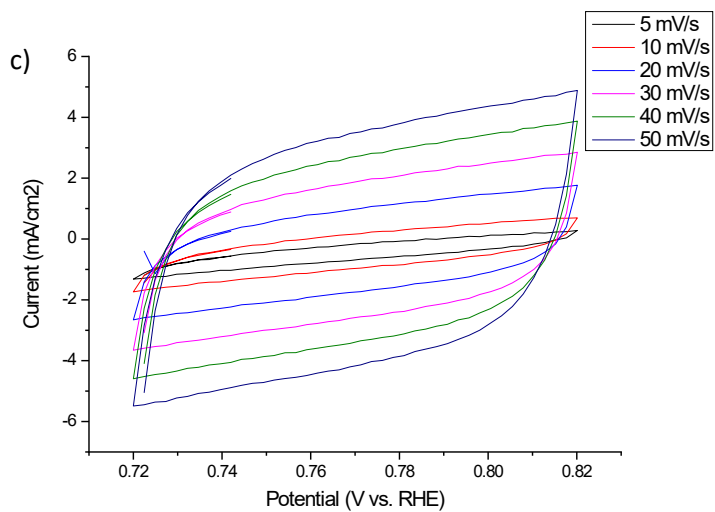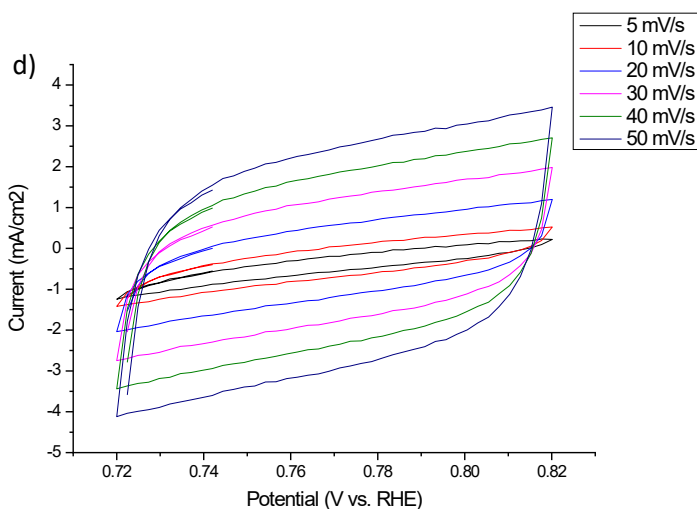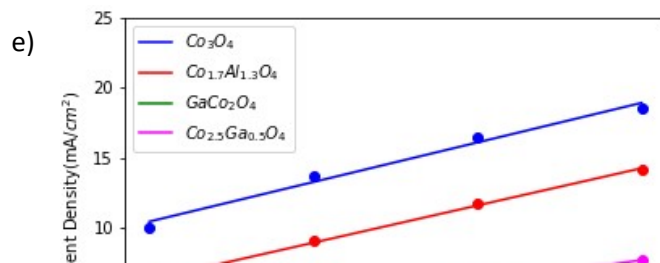

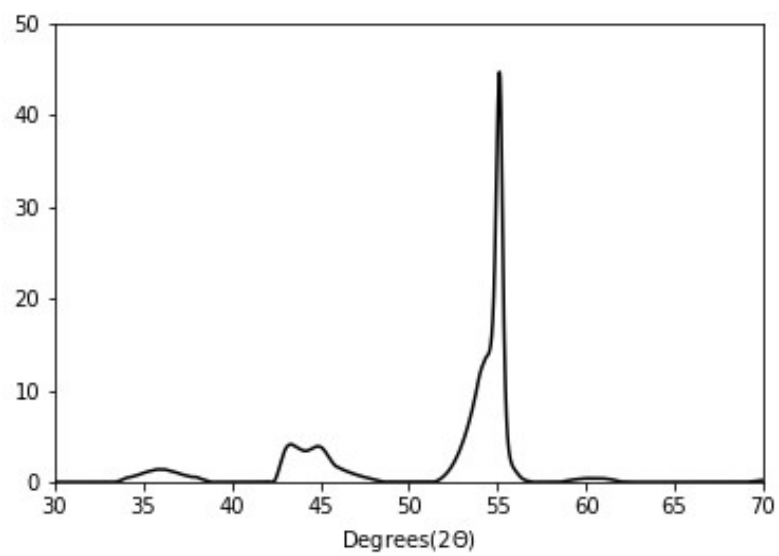

Figure S11: XRD spectrum of the carbon paper substrate

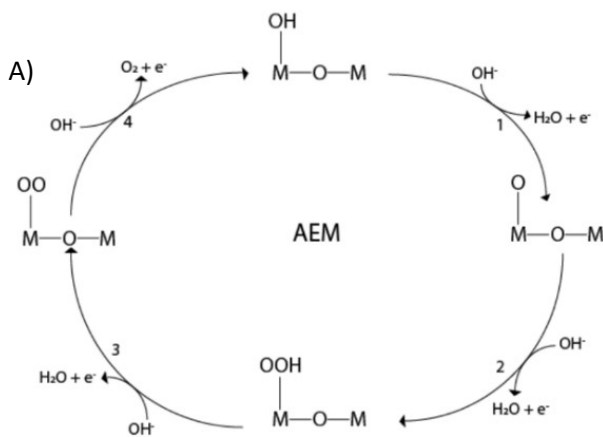

B)

$$\Delta G_1 = \Delta G_{O^*} - \Delta G_{OH^*} + k_B T \ln a_{OH} - eU$$

$$\Delta G_2 = \Delta G_{OOH^*} - \Delta G_{O^*} + k_B T \ln a_{OH} - eU$$

$$\Delta G_3 = \Delta G_{O_2} - \Delta G_{OOH^*} + k_B T \ln a_{OH} - eU$$

$$\Delta G_4 = \Delta G_{OH^*} - \Delta G_{H_2O(l)} + k_B T \ln a_{OH} - eU$$

Figure S12: a) The four-step AEM mechanism of water oxidation b) Free energy calculations of each step outlined in a) based on the computational hydrogen electrode model.  $\Delta G_{O^*}$ ,  $\Delta G_{OH^*}$ ,  $\Delta G_{OOH^*}$  and  $\Delta G_{H_2O}$  refer to the binding energies of  $O^*$ ,  $OH^*$ ,  $OOH^*$  and  $H_2O^*$  on the surface of the material.  $k_B$  refers to the Boltzmann constant,  $T$  refers to the temperature,  $a_{OH}$  refers to the concentration of  $OH^-$  ions,  $e$  is the charge of an electron in eV and  $U$  refers to the applied potential. Calculations are performed with the assumption that  $a_{OH} = 1M$  and  $U = 0V$ .

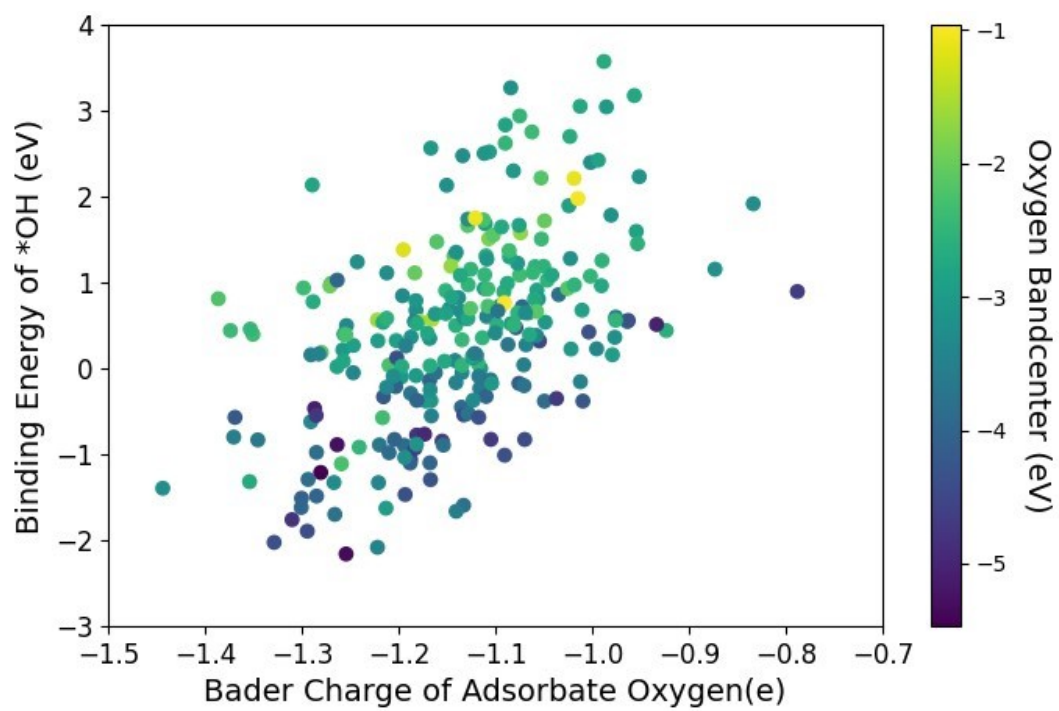

Figure S13: Bader charge of the adsorbate oxygen is plotted against the binding energy of the \*OH intermediate. The colorbar represents the O2p bandcenter of adsorbate oxygen



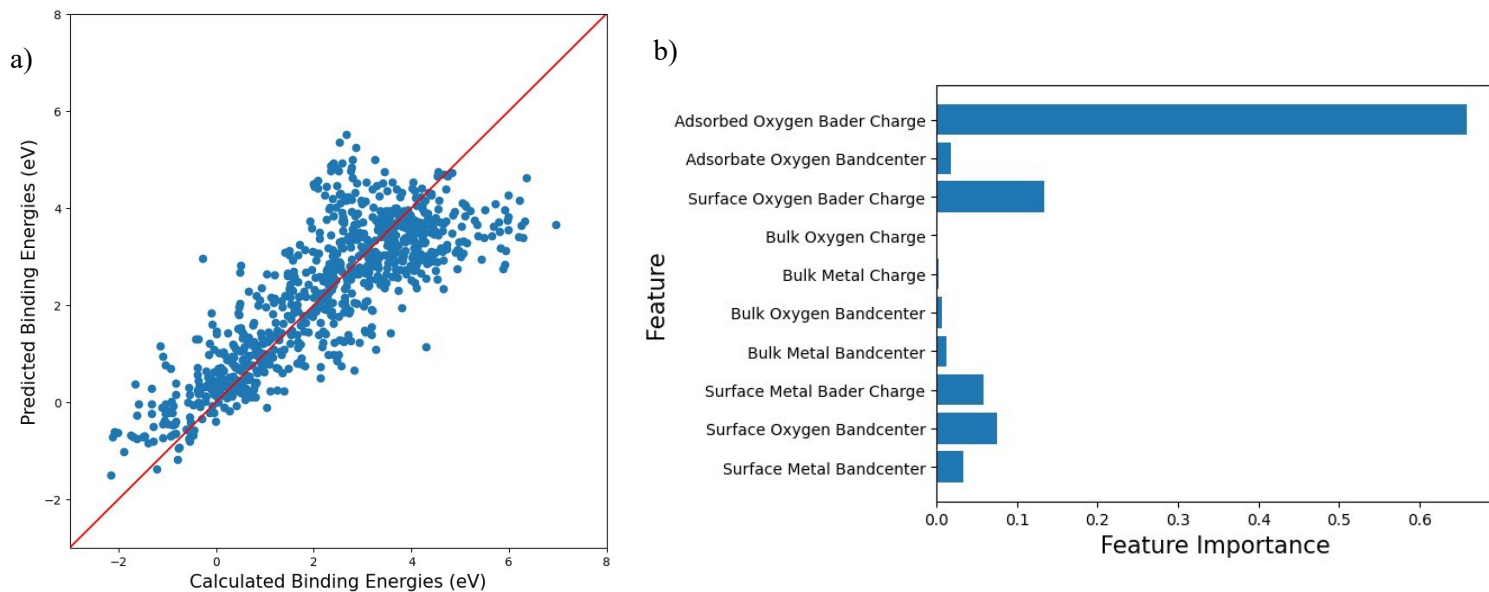

Figure S14: LASSO Regression of binding energies of \*O, \*OH and \*OOH intermediates using the same eight calculated features. LASSO performs a lot more poorly than the random-forest model at predicting the energy of the \*O, \*OH and \*OOH intermediates; with an  $R^2$  value of 0.65 for the training set and an  $R^2$  value of 0.72 for the test set. A) A graph to compare the predicted binding energies of the LASSO model with the calculated ones. The median absolute error is 0.56 eV for both the training and test sets. B) A bar graph that denotes the relative importance of the features that were inputs into the model. Just like in the random-forest model, the Bader charge of adsorbed oxygen was the single most important factor predicting the binding energies of the intermediates.
